# Supplementary material
Source: Springer Nature journal article supplement (https://www.springermedizin.de/resource/supplementary/12879_2012_2513_MOESM4_ESM.pdf/9444750)

Oct 06-Sep 07
  Oct 07-Sep 08
  Oct 08-Sep 09
  Oct 09-Sep 10
  Oct 10-Sep 11

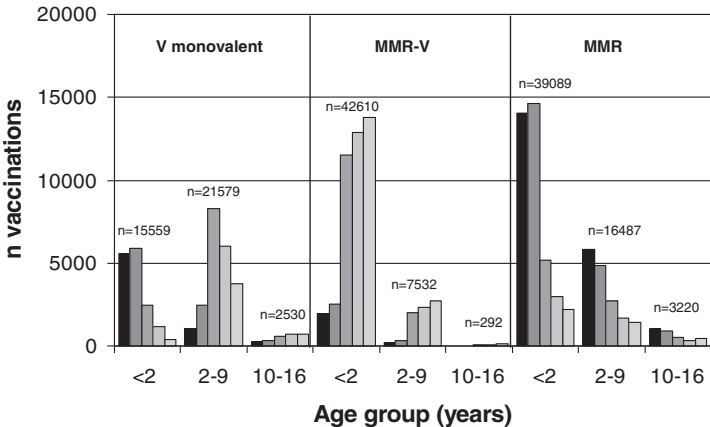

Supplement: MOESM4 [file 9444750]
